# Supplementary material for: Short, Lipidated Dendrimeric γ-AApeptides as New Antimicrobial Peptidomimetics
Source: MDPI journal article supplement (doi:10.3390/ijms24076407), 2023-03-29
Supplement: s1 [file s1]

Supporting information

# Short, Lipidated Dendrimeric $\gamma$ -AApeptides as New Antimicrobial Peptidomimetics

Yafeng Wang <sup>1</sup>, Menglin Xue <sup>1</sup>, Ruixuan Gao <sup>1</sup>, Soumyadeep Chakraborty <sup>2</sup>, Shaohui Wang <sup>2</sup>, Xue Zhao <sup>2</sup>, Meng Gu <sup>2</sup>, Chuanhai Cao <sup>3</sup>, Xingmin Sun <sup>2</sup> and Jianfeng Cai <sup>1,\*</sup>

<sup>1</sup> Department of Chemistry, University of South Florida, 4202 E. Fowler Ave., Tampa, FL 33620, USA

<sup>2</sup> Department of Molecular Medicine, Morsani College of Medicine, University of South Florida, 12901 Bruce B Downs Blvd., Tampa, FL 33612, USA

<sup>3</sup> College of Pharmacy, University of South Florida, 12901 Bruce B Downs Blvd., Tampa, FL 33612, USA

\* Correspondence: jianfengcai@usf.edu

|                                                                       |    |
|-----------------------------------------------------------------------|----|
| 1. GENERAL SYNTHESIS OF COMPOUND .....                                | 2  |
| 2. HPLC DATA .....                                                    | 2  |
| 3. <sup>1</sup> H NMR SPECTRUM AND <sup>13</sup> C NMR SPECTRUM ..... | 5  |
| 4. TABLE S1: HRMS DATA .....                                          | 14 |

## 1. General Synthesis of Compound

The Fmoc-protected amino acids were bought from Chemimpex, and the reagents used in the reaction were bought from Fisher Scientific and Sigma Aldrich. The building blocks were synthesized according to a previously published paper [1]. Next, the building block was loaded on Rink-Amide beads with DIC and HOBt in DMF, reacting for 4 hours. After deprotecting the Fmoc protecting, palmitic acid was coupled with DIC and HOBt again. The Alloc protecting group of the secondary amine was removed with dimethylamine boron ((CH<sub>3</sub>)<sub>2</sub>NH.BH<sub>3</sub>), and tetrakis (triphenylphosphine) palladium, the second building, was coupled similarly to the first building block. The Alloc protecting group was deprotected again, then the couple Fmoc-protected beta alanine was also deprotected. Subsequently, the Fmoc was removed, and the beads were cleaved with 50% TFA in DCM. The solvent was removed, and the solid was precipitated with cold ether. Finally, the oil was purified by HPLC, and the final product was obtained.

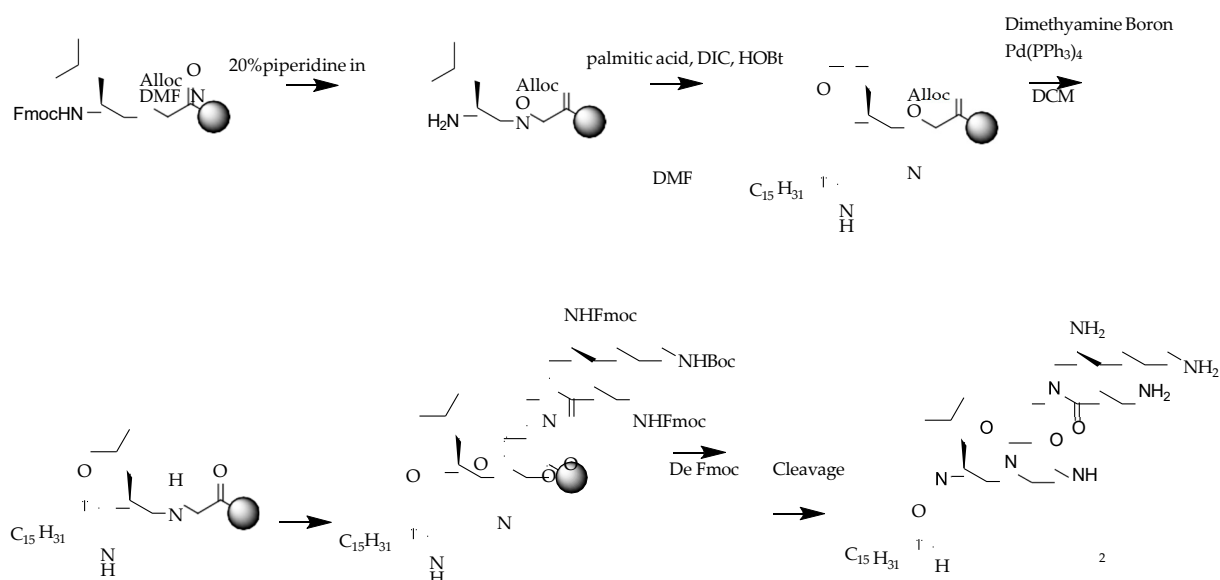

## 2. HPLC Data

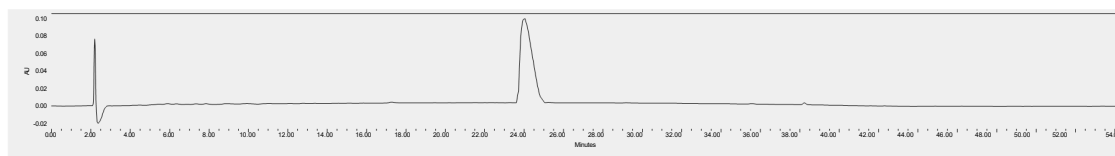

YW-1

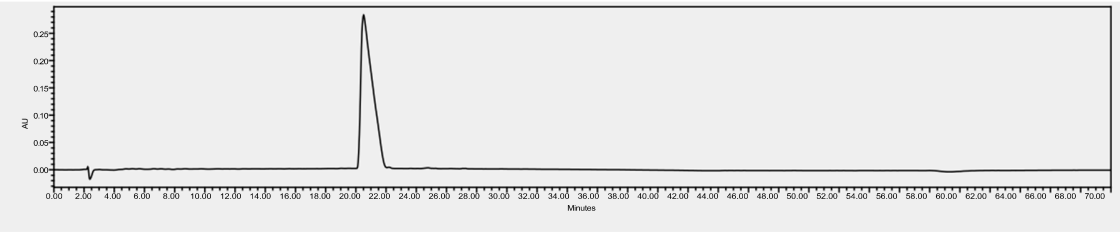

YW-2

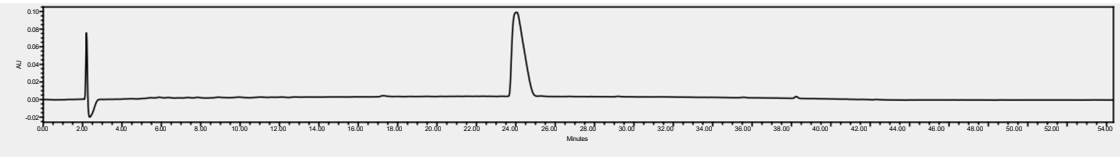

YW-3

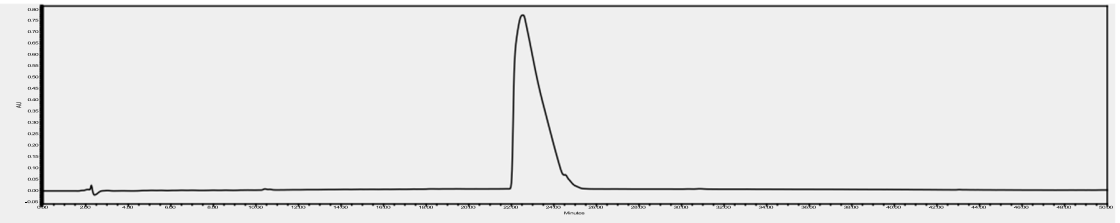

YW-4

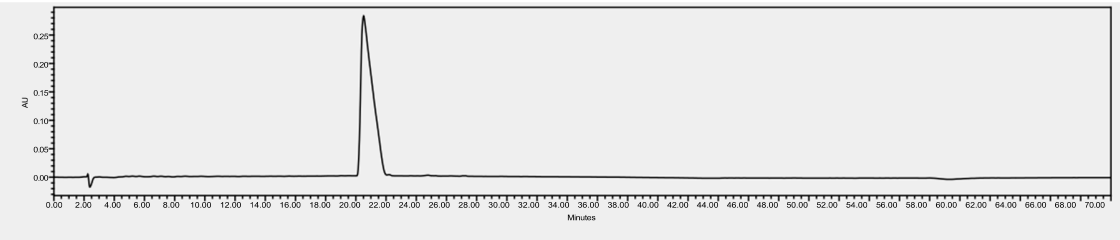

YW-5

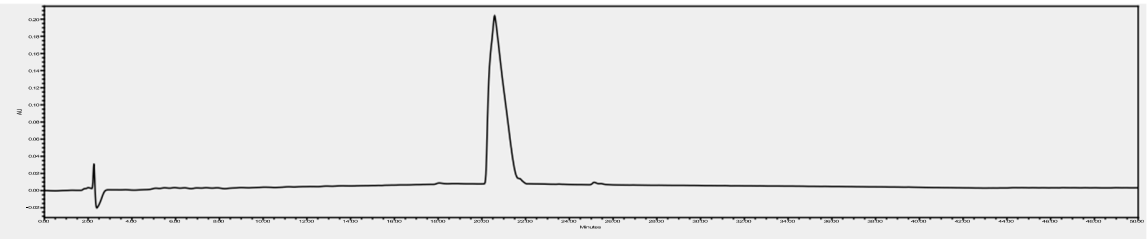

YW-6

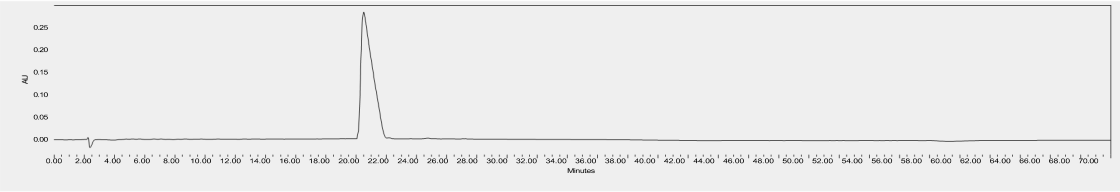

YW-7

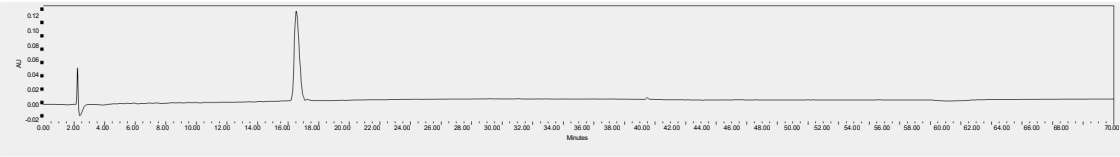

YW-8

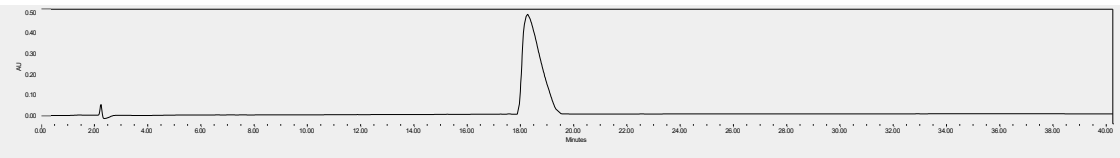

YW-9

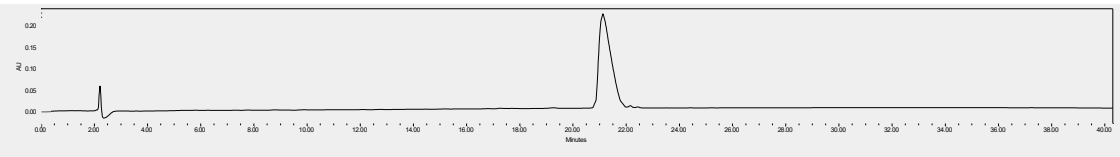

YW-10

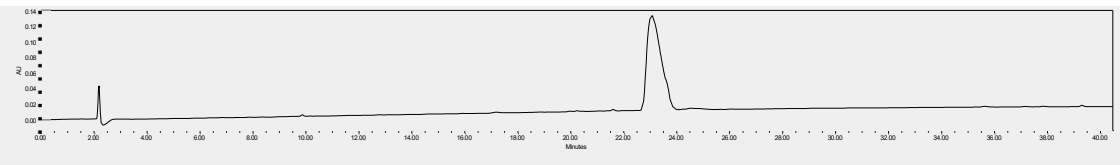

YW-11

### 3. <sup>1</sup>H NMR Spectrum and <sup>13</sup>C NMR Spectrum

YW-1:

<sup>1</sup>H NMR (600 MHz, DMSO-*d*<sub>6</sub>) δ 8.09 (s, 1H), 7.96 – 7.71 (m, 9H), 7.57 (d, *J* = 8.9 Hz, 1H), 7.37 (d, *J* = 22.1 Hz, 1H), 7.17 (d, *J* = 12.8 Hz, 1H), 6.99 (d, *J* = 14.9 Hz, 1H), 4.10 – 3.88 (m, 3H), 3.74 (d, *J* = 16.5 Hz, 1H), 3.50 (ddd, *J* = 33.1, 14.7, 7.5 Hz, 4H), 3.26 – 3.16 (m, 1H), 3.02 (qd, *J* = 6.4, 3.2 Hz, 2H), 2.75 (dddd, *J* = 28.1, 13.9, 6.9, 3.1 Hz, 5H), 2.11 – 1.95 (m, 2H), 1.64 – 1.30 (m, 10H), 1.24 (s, 26H), 0.89 – 0.83 (m, 6H), 0.80 (dd, *J* = 10.4, 6.5 Hz, 3H).

<sup>13</sup>C NMR (151 MHz, DMSO-*d*<sub>6</sub>) δ 172.72, 172.49, 170.78, 158.82, 158.61, 38.94, 36.02, 35.73, 31.74, 30.46, 29.50, 29.15, 28.97, 27.14, 24.78, 23.80, 22.55, 22.01, 21.72, 14.41.

YW-2:

<sup>1</sup>H NMR (600 MHz, DMSO-*d*<sub>6</sub>) δ 8.20 – 7.96 (m, 1H), 7.94 – 7.71 (m, 9H), 7.30 – 7.10 (m, 6H), 4.27 – 4.09 (m, 1H), 4.08 – 3.94 (m, 1H), 3.93 – 3.75 (m, 1H), 3.56 (ddd, *J* = 87.1, 13.0, 5.8 Hz, 4H), 3.02 (p, *J* = 6.4 Hz, 2H), 2.94 (dd, *J* = 13.4, 7.4 Hz, 1H), 2.85 – 2.53 (m, 7H), 2.45 (q, *J* = 7.0 Hz, 1H), 1.93 (td, *J* = 7.3, 4.0 Hz, 2H), 1.53 (dtt, *J* = 17.2, 10.4, 5.2 Hz, 4H), 1.45 – 1.10 (m, 27H), 1.09 – 0.94 (m, 2H), 0.85 (t, *J* = 6.9 Hz, 3H).

<sup>13</sup>C NMR (151 MHz, DMSO-*d*<sub>6</sub>) δ 171.27, 170.78, 158.54, 129.45, 128.50, 128.39, 118.54, 116.71, 49.99, 47.31, 44.32, 38.95, 31.75, 29.52, 29.38, 29.16, 27.17, 25.67, 22.55, 22.02, 14.42.

YW-3:

<sup>1</sup>H NMR (600 MHz, DMSO-*d*<sub>6</sub>) δ 7.95 – 7.69 (m, 9H), 4.07 – 3.76 (m, 3H), 3.50 (dd, *J* = 17.8, 10.9 Hz, 4H), 3.24 (dd, *J* = 7.3, 3.6 Hz, 1H), 3.01 (h, *J* = 6.2 Hz, 2H), 2.85 – 2.63 (m, 5H), 2.02 (dq, *J* = 12.1, 7.0 Hz, 2H), 1.62 – 1.49 (m, *J* = 6.5 Hz, 4H), 1.49 – 1.35 (m, 4H), 1.24 (s, 24H), 1.05 (d, *J* = 6.7 Hz, 1H), 0.97 (d, *J* = 6.7 Hz, 1H), 0.85 (t, *J* = 6.9 Hz, 3H).

<sup>13</sup>C NMR (151 MHz, DMSO-*d*<sub>6</sub>) δ 172.19, 171.93, 158.82, 158.62, 117.72, 116.43, 49.91, 47.31, 43.58, 38.95, 35.74, 31.75, 30.39, 29.51, 29.47, 29.16, 27.16, 25.70, 22.55, 22.01, 18.70, 18.46, 14.42.

YW-4

<sup>1</sup>H NMR (600 MHz, DMSO-*d*<sub>6</sub>) δ 8.11 (d, *J* = 7.8 Hz, 1H), 7.98 – 7.68 (m, 9H), 7.03 – 6.91 (m, 3H), 6.67 – 6.58 (m, 2H), 4.17 – 3.75 (m, 3H), 3.57 (td, *J* = 13.7, 6.2 Hz, 2H), 3.41 – 3.28 (m, 3H), 3.25 (dd, *J* = 15.1, 9.2 Hz, 1H), 3.01 (h, *J* = 6.2 Hz, 2H), 2.92 (dd, *J* = 13.4, 7.7 Hz, 1H), 2.83 – 2.56 (m, 6H), 2.43 (dd, *J* = 13.5, 9.3 Hz, 1H), 1.95 (tt, *J* = 7.6, 3.1 Hz, 2H), 1.55 (tt, *J* = 14.0, 5.2 Hz, 4H), 1.46 – 1.30 (m, 4H), 1.30 – 1.13 (m, 22H), 1.09 (h, *J* = 7.0 Hz, 2H), 0.85 (t, *J* = 7.0 Hz, 3H).

<sup>13</sup>C NMR (151 MHz, DMSO-*d*<sub>6</sub>) δ 172.62, 171.79, 170.95, 158.97, 158.76, 156.14, 130.27, 128.92, 118.51, 116.53, 115.34, 115.23, 49.92, 47.40, 38.93, 37.31, 36.07, 35.72, 31.75, 29.47, 29.17, 27.16, 25.68, 22.55, 22.02, 14.41.

YW-5

$^1\text{H}$  NMR (600 MHz, DMSO- $d_6$ )  $\delta$  8.03 (s, 1H), 7.89 – 7.63 (m, 9H), 4.08 – 3.76 (m, 4H), 3.57 – 3.38 (m, 6H), 3.03 (dp,  $J$  = 17.3, 6.8, 6.0 Hz, 3H), 2.84 – 2.63 (m, 6H), 2.10 – 1.99 (m, 2H), 1.53 (h,  $J$  = 6.4, 5.4 Hz, 4H), 1.43 (dt,  $J$  = 30.3, 7.3 Hz, 4H), 1.24 (s, 24H), 0.86 (t,  $J$  = 6.9 Hz, 3H).

$^{13}\text{C}$  NMR (151 MHz, DMSO- $d_6$ )  $\delta$  172.75, 171.00, 159.29, 158.54, 50.10, 49.42, 38.97, 35.75, 31.75, 30.40, 29.53, 29.31, 29.17, 27.18, 25.72, 22.56, 14.42.

YW-6:

$^1\text{H}$  NMR (600 MHz, DMSO- $d_6$ )  $\delta$  8.06 (s, 1H), 7.78 (d,  $J$  = 31.6 Hz, 13H), 3.95 (dd,  $J$  = 20.6, 4.1 Hz, 2H), 3.88 (d,  $J$  = 14.1 Hz, 1H), 3.72 (d,  $J$  = 16.5 Hz, 1H), 3.58 – 3.40 (m, 4H), 3.01 (s, 2H), 2.95 (dd,  $J$  = 13.7, 8.3 Hz, 1H), 2.76 (dtd,  $J$  =

31.4, 17.3, 14.7, 7.3 Hz, 8H), 2.45 – 2.35 (m, 1H), 2.03 (dq,  $J = 9.5, 7.0, 6.6$  Hz, 2H), 1.62 – 1.36 (m, 13H), 1.24 (s, 31H), 0.86 (t,  $J = 6.9$  Hz, 3H).

$^{13}\text{C}$  NMR (151 MHz, DMSO- $d_6$ )  $\delta$  171.75, 169.58, 159.06, 158.32, 47.62, 45.31, 43.94, 39.03, 31.75, 29.54, 29.17, 22.55, 14.42.

YW-1:

$^1\text{H}$  NMR (600 MHz, DMSO- $d_6$ )  $\delta$  8.05 (s, 1H), 7.95 – 7.53 (m, 11H), 4.09 – 3.84 (m, 3H), 3.73 (d,  $J = 16.5$  Hz, 1H), 3.51

(s, 6H), 3.25 (s, 2H), 3.10 – 2.88 (m, 4H), 2.85 – 2.63 (m, 5H), 2.46 – 2.35 (m, 1H), 2.02 (dq,  $J = 10.1, 6.9$  Hz, 2H), 1.60 – 1.05 (m, 38H), 0.85 (t,  $J = 6.9$  Hz, 3H).

$^{13}\text{C}$  NMR (151 MHz, DMSO- $d_6$ )  $\delta$  172.04, 171.95, 158.82, 158.66, 157.24, 118.85, 117.36, 50.22, 47.53, 44.10, 39.00, 36.22, 36.07, 35.73, 31.75, 29.54, 29.17, 22.55, 14.42.

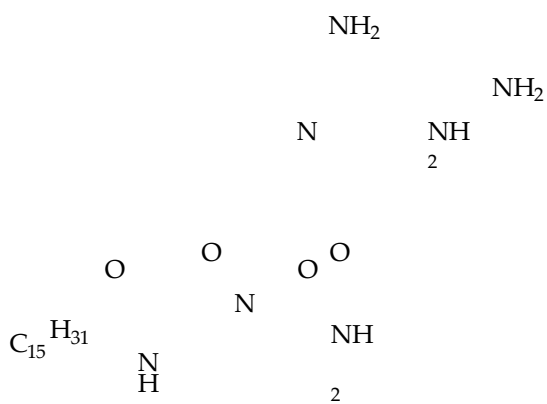

YW-1

YW-1 carbon.10.fid  
C13CPD DMSO /mnt/d2/iconnm  
172.01  
144.52  
136.78  
136.82  
136.61  
136.21  
118.33  
116.39  
79.16  
49.90  
45.82  
45.73  
44.66  
38.94  
35.73  
31.74  
29.50  
29.15  
27.14  
25.76  
24.85  
23.80  
22.55  
21.72  
14.41

4500  
4000  
3500  
3000  
2500  
2000  
1500  
1000  
500



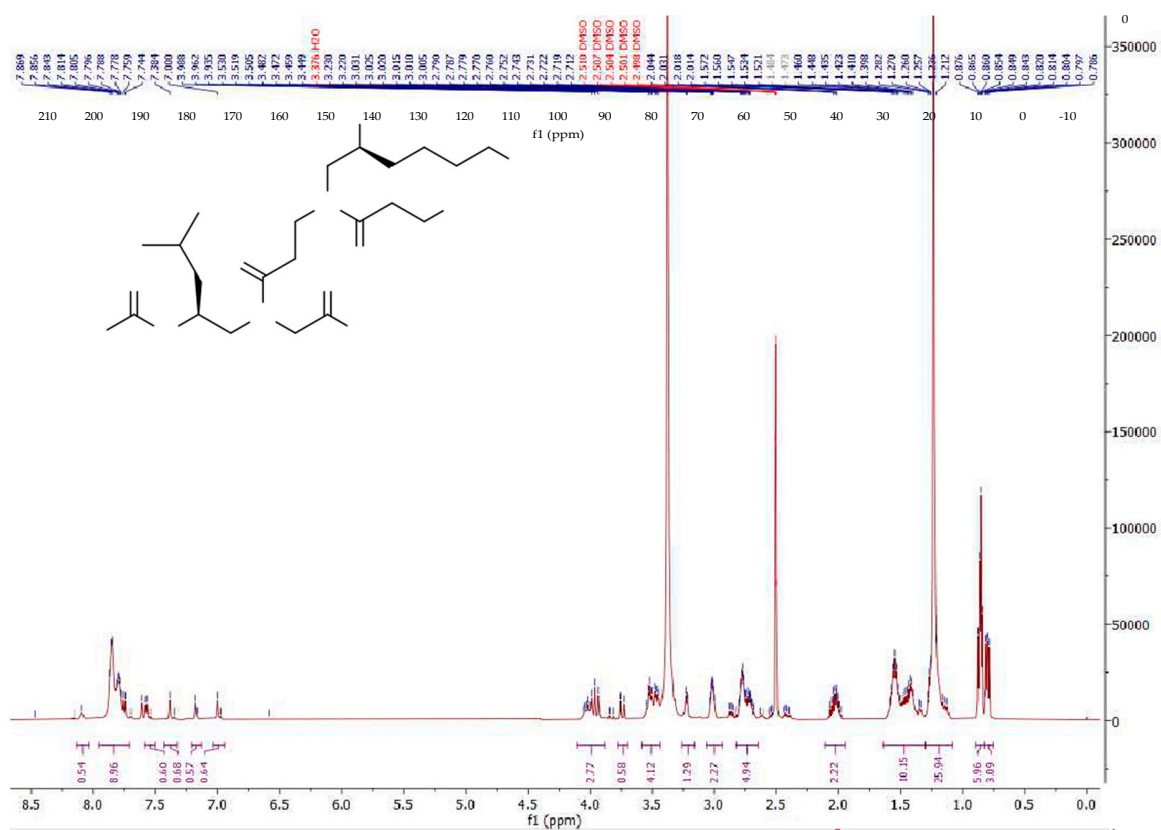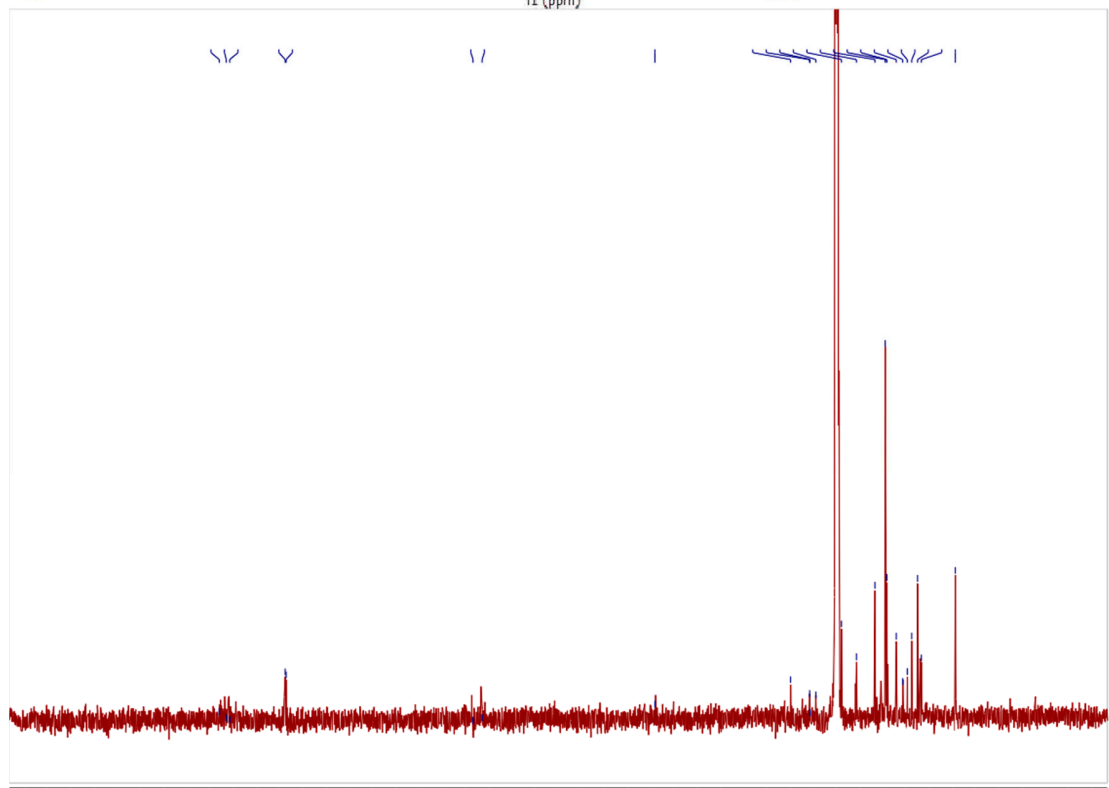

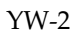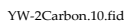

C13CPD DMSO /nfs/neo600/d2/iconnmr/data/ywang ywang 6

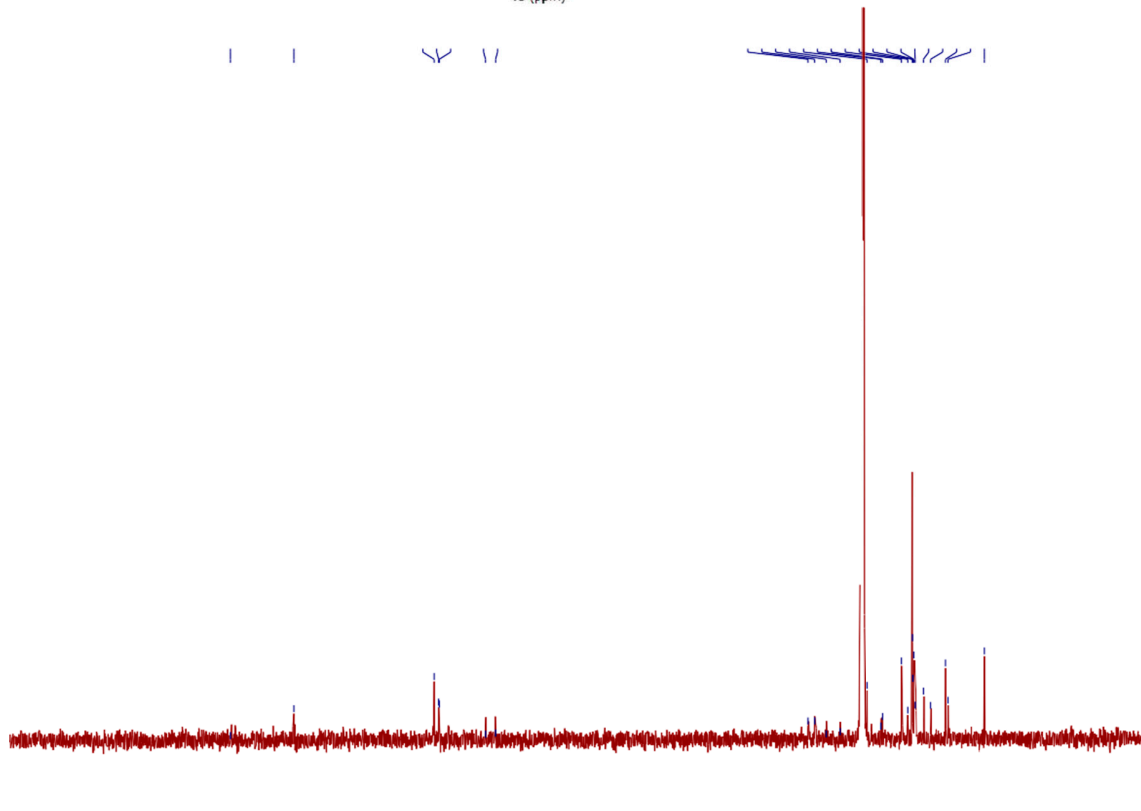

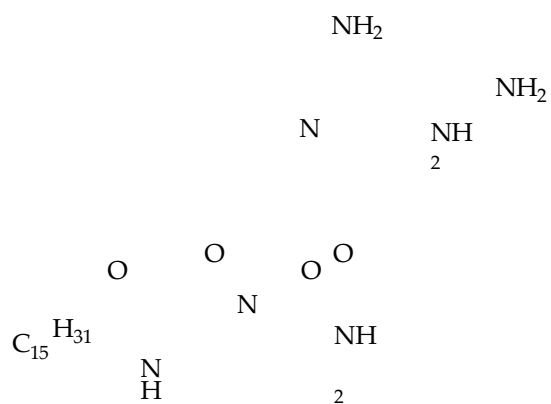

YW-3

YW-3 carbon.10.fid  
C13CPD DMSO /mnt/d2/iconnmr/data/sxue sxue 22

158.82  
158.62

119.08  
117.14

40.39 DMSO  
40.25 DMSO  
39.97 DMSO  
39.83 DMSO  
39.69 DMSO  
39.55 DMSO  
38.95  
35.74  
31.75  
29.59  
29.51  
29.47  
29.44  
29.26  
29.15  
27.16  
25.70  
25.55  
22.01  
18.70  
18.46  
14.47

4000  
3800  
3600  
3400  
3200  
3000  
2800  
2600  
2400  
2200  
2000  
1800  
1600  
1400  
1200  
1000  
800  
600  
400

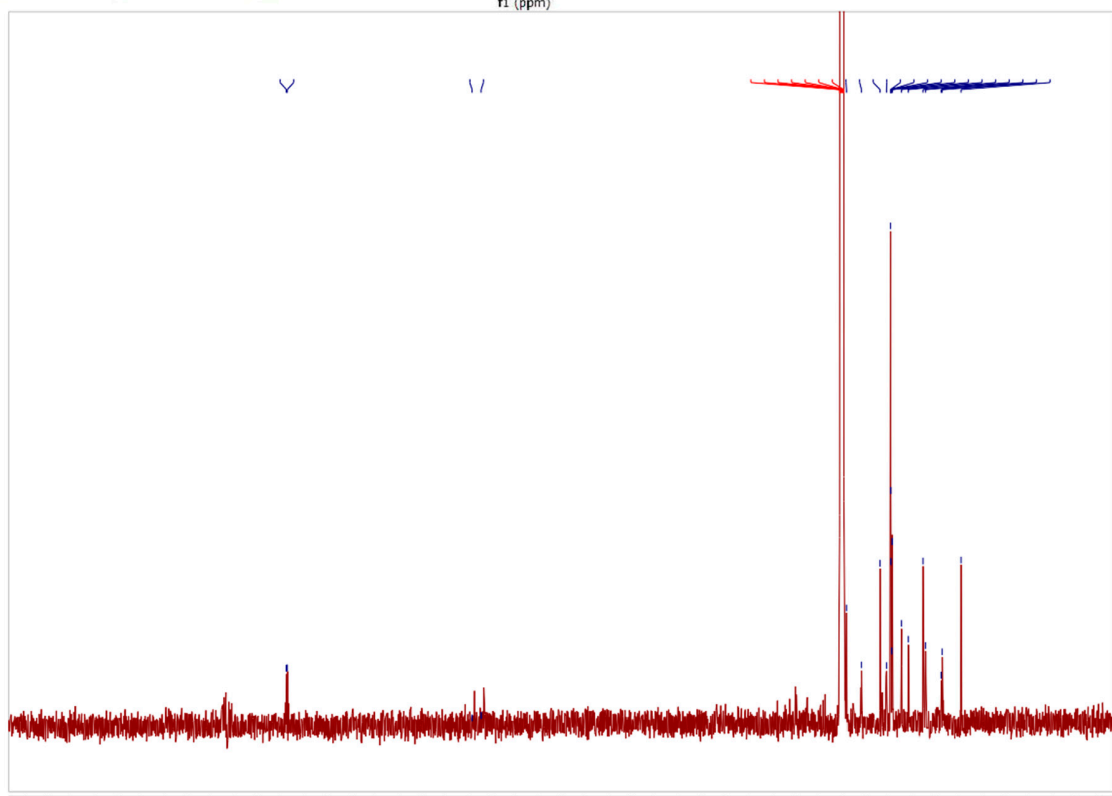

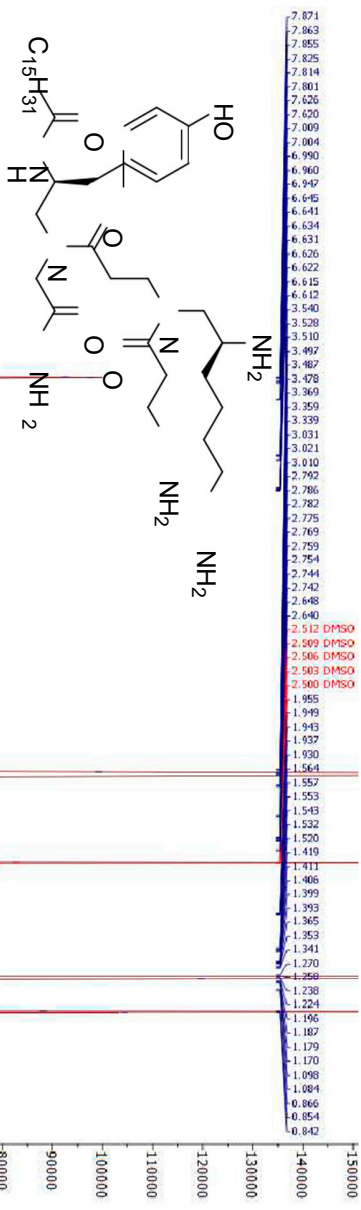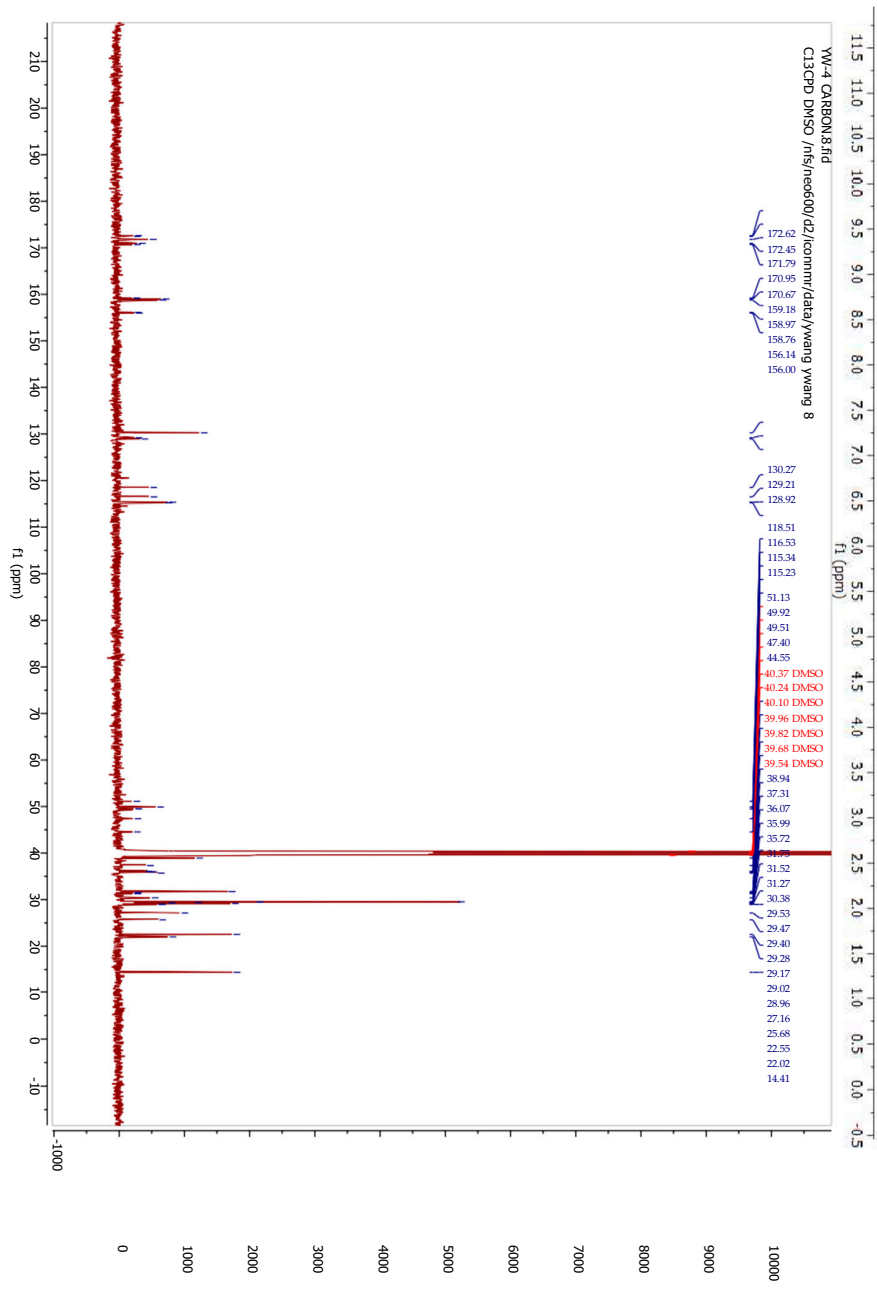

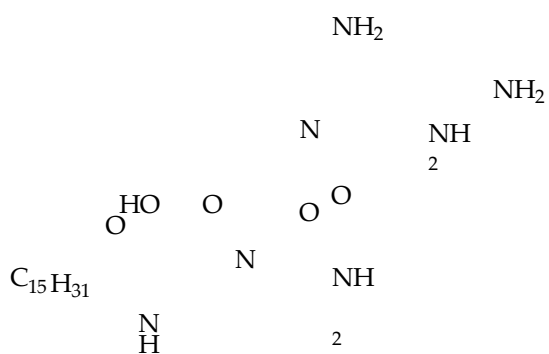

YW-5

YW-5.11.fid

C13CPD DMSO /nfs/neo600/d2/iconnmr/data/ywang ywang 13

171.52

159.29

131.61  
129.60

59.44  
40.40 DMSO  
40.26 DMSO  
40.12 DMSO  
39.98 DMSO  
39.84 DMSO  
39.72 DMSO  
39.57 DMSO  
35.75  
31.75  
30.40  
29.53  
29.31  
29.17  
27.18  
25.72  
22.56  
14.42

3800  
3600  
3400  
3200  
3000  
2800  
2600  
2400  
2200  
2000  
1800  
1600  
1400  
1200  
1000  
800  
600  
400

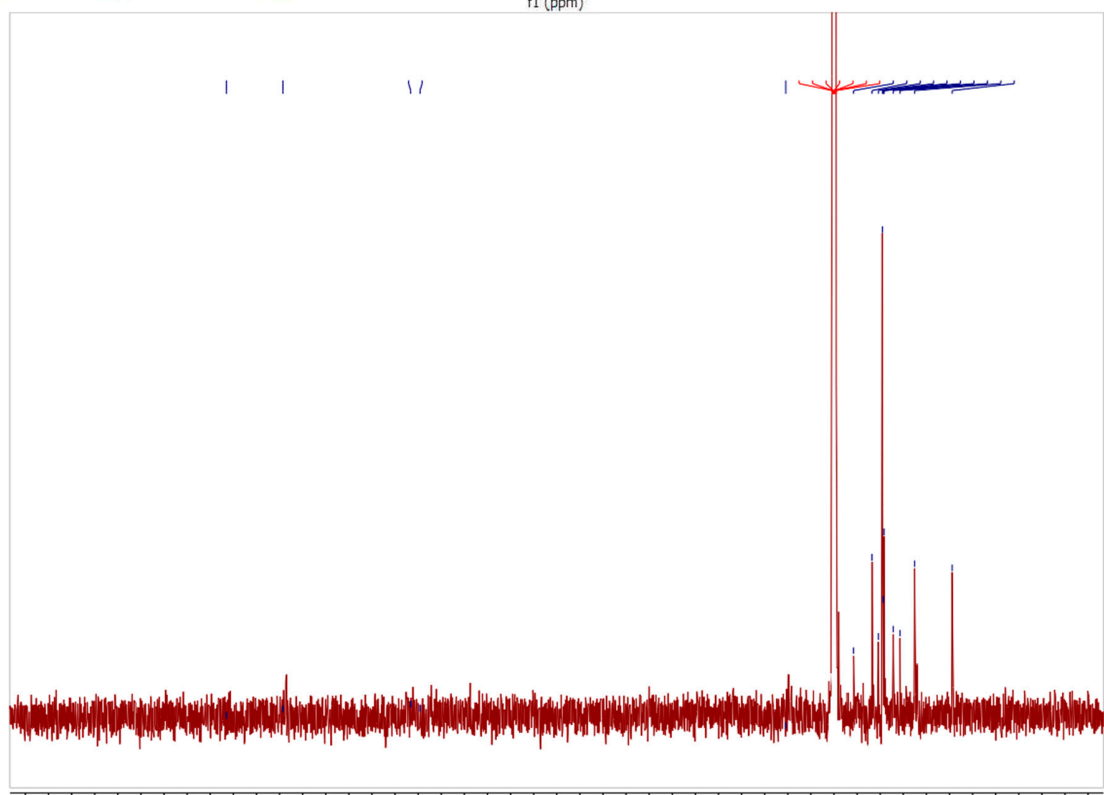



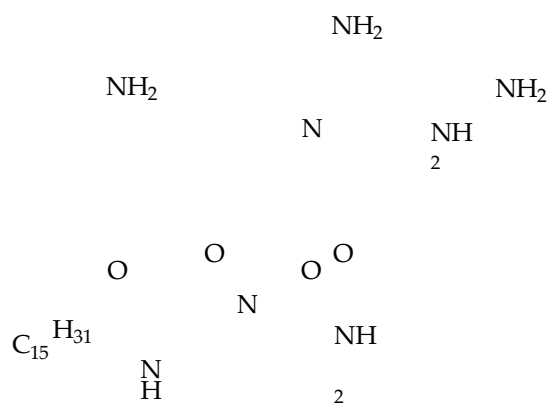

YW-6

YW-6.11.fid  
C13CPD DMSO /nfs/neo600/d2/iconntr/data/yw-6.11.fid yw-6.11

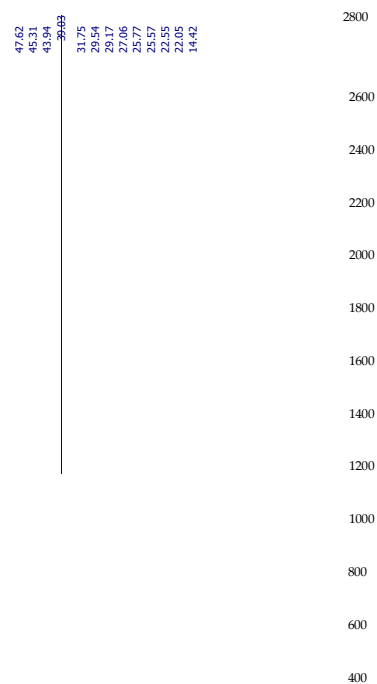

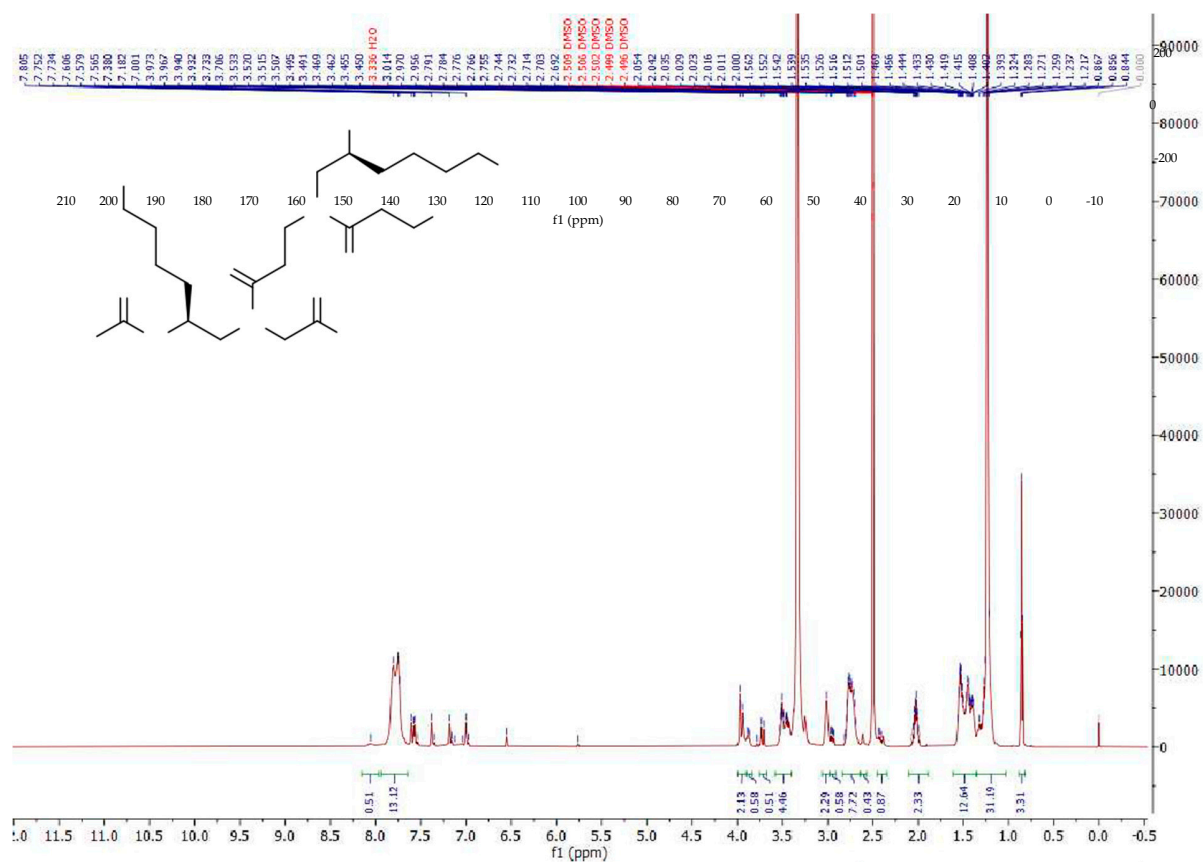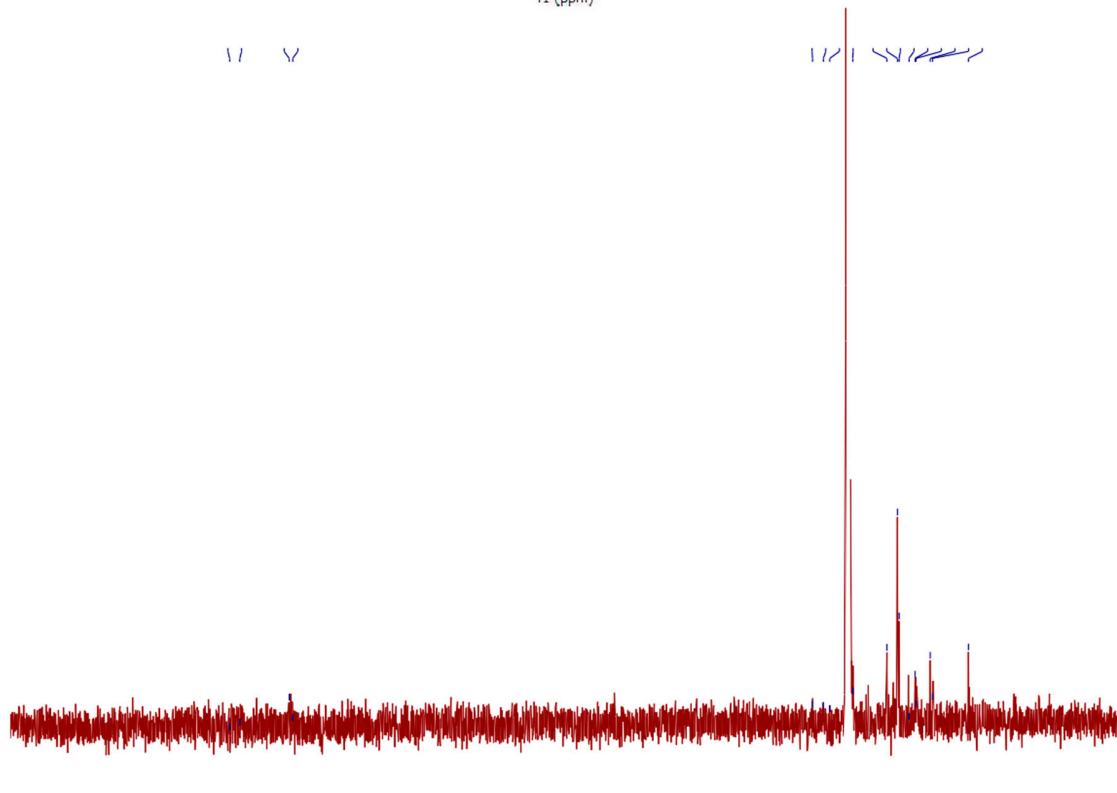

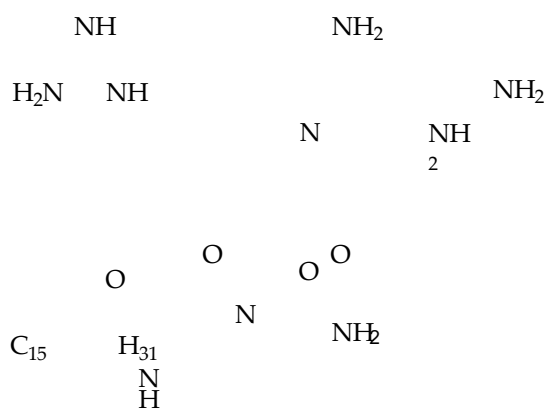

YW-7

YW-7.11.fid  
C13CPD DMSO /nfs/neo600/d2/iconnmr/data/ywang ywang 12

159.06  
157.35

116.61

40.39 DMSO  
40.26 DMSO  
40.12 DMSO  
39.98 DMSO  
39.84 DMSO  
39.70 DMSO  
39.56 DMSO  
36.71  
31.75  
29.94  
29.17  
27.12  
25.97  
22.55  
14.42

3800  
3600  
3400  
3200  
3000  
2800  
2600  
2400  
2200  
2000  
1800  
1600  
1400  
1200  
1000  
800  
600

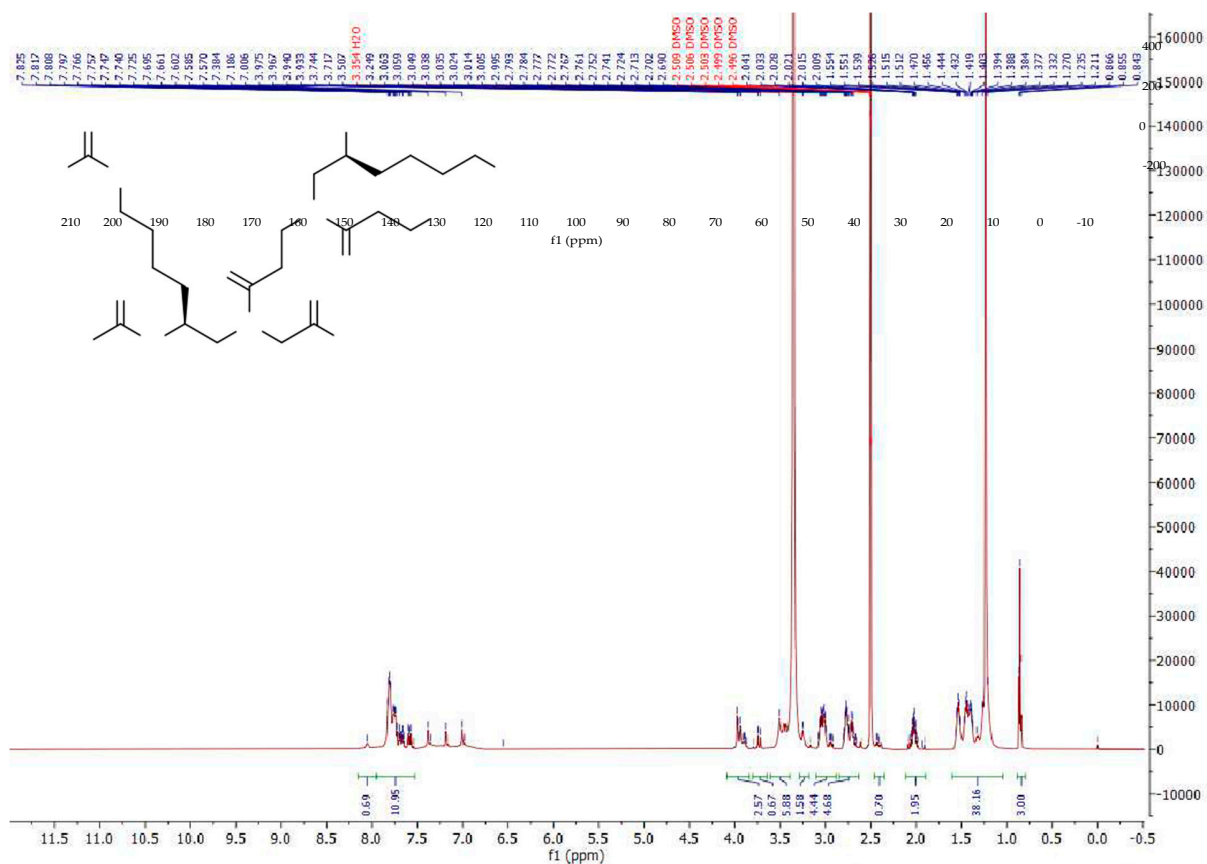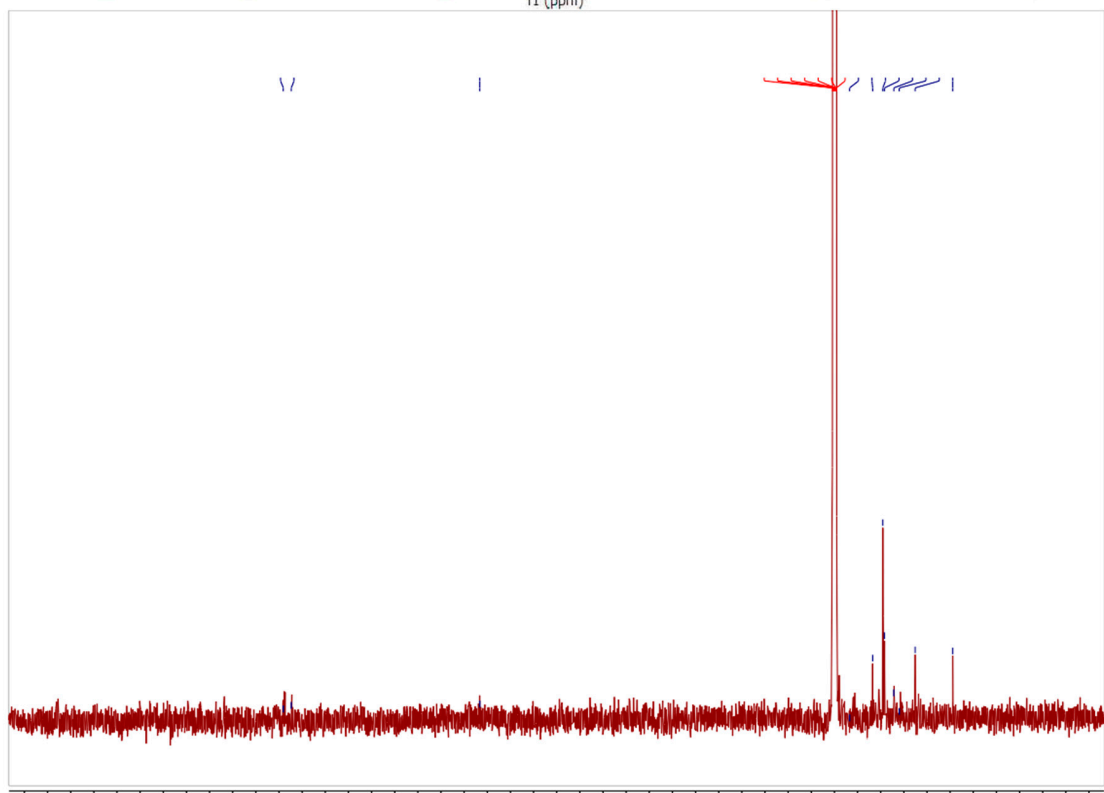

3. Table S1: HRMS data

| Peptide | HRMS (ESI) [Exact Mass+H <sup>+</sup> ] calculated | HRMS (ESI) [Exact Mass+H <sup>+</sup> ] found |
|---------|----------------------------------------------------|-----------------------------------------------|
| YW-1    | 667.5742                                           | 668.5747                                      |
| YW-2    | 701.5568                                           | 702.5604                                      |
| YW-3    | 625.5255                                           | 626.5286                                      |
| YW-4    | 717.5517                                           | 718.5532                                      |
| YW-5    | 641.5204                                           | 642.5214                                      |
| YW-6    | 682.5833                                           | 683.5852                                      |
| YW-7    | 724.6051                                           | 725.6050                                      |
| YW-8    | 673.5255                                           | 674.5298                                      |
| YW-9    | 645.4942                                           | 646.4979                                      |
| YW-10   | 617.4629                                           | 618.4668                                      |
| YW-11   | 589.4316                                           | 590.4355                                      |

#### References

1. Singh, S.; Wang, M.; Gao, R.; Teng, P.; Odom, T.; Zhang, E.; Xu, H.; Cai, J.; Hu, Y.; Amin, M.N.; et al. Lipo- $\gamma$ -AApeptides as a New Class of Potent and Broad-Spectrum Antimicrobial Agents. *J. Med. Chem.* **2012**, *55*, 4003–4009. <https://doi.org/10.1021/jm300274p>
